# Supplementary material for: Validation of FRIEND and ACSM Equations for Cardiorespiratory Fitness: Comparison to Direct Measurement in CAD Patients
Source: PubMed Central journal article supplement (PMC7356312; doi:10.3390/jcm9061889), 2020-06-17
Supplement: jcm-09-01889-s001.pdf [file jcm-09-01889-s001.pdf]

**Table S1.** Equivalence analysis of the ACSM equation and the FRIEND equation according to medication.

| Medication |            | Method | Mean $\pm$ SD<br>(mL/kg/min) | MAPE  | 95% CI        | Lin's CCC | 95% CI      |
|------------|------------|--------|------------------------------|-------|---------------|-----------|-------------|
| BB         | Taking     | Direct | 25.09 $\pm$ 0.43             |       |               |           |             |
|            |            | ACSM   | 29.90 $\pm$ 0.55             | 20.96 | 18.97 - 22.94 | 0.65      | 0.60 - 0.70 |
|            |            | FRIEND | 25.00 $\pm$ 0.39             | 8.63  | 7.47 - 9.79   | 0.87      | 0.82 - 0.90 |
|            | Not taking | Direct | 23.05 $\pm$ 0.48             |       |               |           |             |
|            |            | ACSM   | 27.31 $\pm$ 0.60             | 20.97 | 18.78 - 23.16 | 0.69      | 0.63 - 0.74 |
|            |            | FRIEND | 23.14 $\pm$ 0.43             | 9.30  | 7.93 - 10.68  | 0.86      | 0.82 - 0.90 |
| CCB        | Taking     | Direct | 23.85 $\pm$ 0.56             |       |               |           |             |
|            |            | ACSM   | 28.43 $\pm$ 0.72             | 21.44 | 18.51 - 24.37 | 0.63      | 0.54 - 0.70 |
|            |            | FRIEND | 23.95 $\pm$ 0.52             | 8.80  | 6.93 - 10.67  | 0.83      | 0.76 - 0.89 |
|            | Not taking | Direct | 24.29 $\pm$ 0.40             |       |               |           |             |
|            |            | ACSM   | 28.84 $\pm$ 0.50             | 20.76 | 19.07 - 22.45 | 0.70      | 0.66 - 0.73 |
|            |            | FRIEND | 24.23 $\pm$ 0.36             | 8.99  | 8.00 - 9.99   | 0.88      | 0.85 - 0.91 |

SD; standard deviation, MAPE; mean absolute percent error, CI; confidence interval, Lin's CCC; Lin's concordance correlation coefficient, BB; beta blocker, CCB; calcium channel blocker, ACSM; The American College of Sports Medicine, FRIEND; Fitness Registry and the Importance of Exercise National Database.

**Table S2.** Equivalence analysis of the ACSM equation and the FRIEND equation according to clinical presentation.

| Diagnosis             | Method | Mean $\pm$ SD<br>(mL/kg/min) | MAPE  | 95% CI        | Lin's CCC | 95% CI      |
|-----------------------|--------|------------------------------|-------|---------------|-----------|-------------|
| Myocardial infarction | Direct | 24.42 $\pm$ 0.52             |       |               |           |             |
|                       | ACSM   | 29.20 $\pm$ 0.67             | 20.37 | 17.97 - 22.76 | 0.66      | 0.61 - 0.71 |
|                       | FRIEND | 24.50 $\pm$ 0.48             | 8.13  | 6.88 - 9.38   | 0.89      | 0.85 - 0.92 |
| Angina                | Direct | 24.01 $\pm$ 0.42             |       |               |           |             |
|                       | ACSM   | 28.44 $\pm$ 0.52             | 21.30 | 19.44 - 23.16 | 0.68      | 0.64 - 0.73 |
|                       | FRIEND | 23.95 $\pm$ 0.37             | 9.4   | 8.20 - 10.59  | 0.86      | 0.82 - 0.89 |

SD; standard deviation, MAPE; mean absolute percent error, CI; confidence interval, Lin's CCC; Lin's concordance correlation coefficient, ACSM; The American College of Sports Medicine, FRIEND; Fitness Registry and the Importance of Exercise National Database.

**Table S3.** RER level comparison of CRF between direct measured CRF and estimated CRF by the ACSM equation and FRIEND equations.

|                 | VO <sub>2</sub> max $\pm$ SD<br>(mL/kg/min) |                  | p-value <sup>+</sup> | FRIEND           | p-value <sup>+</sup> |
|-----------------|---------------------------------------------|------------------|----------------------|------------------|----------------------|
|                 | Direct                                      | ACSM             |                      |                  |                      |
| RER $\geq$ 1.10 | 26.34 $\pm$ 5.19                            | 32.39 $\pm$ 5.80 | <0.001               | 26.78 $\pm$ 4.12 | 0.442                |
| RER $\geq$ 1.0  | 24.93 $\pm$ 5.42                            | 30.02 $\pm$ 6.48 | <0.001               | 25.09 $\pm$ 4.65 | 0.736                |
| RER < 1.0       | 20.62 $\pm$ 4.83                            | 22.39 $\pm$ 5.84 | 0.109                | 19.62 $\pm$ 4.20 | 0.282                |
| RER < 0.9       | 18.86 $\pm$ 4.53                            | 19.65 $\pm$ 4.73 | 0.620                | 17.67 $\pm$ 3.35 | 0.390                |
| p-value*        | <0.001                                      | <0.001           |                      | <0.001           |                      |

RER  $\geq$  1.0 includes RER  $\geq$  1.1 and RER < 1.0 also includes RER < 0.9. p-value\*; statistical difference between RER  $\geq$  1.0 and RER < 1.0. p-value+; statistical difference between Direct methods and estimate methods. SD; standard deviation, RER; respiratory exchange ratio, ACSM; The American College of Sports Medicine, FRIEND; Fitness Registry and the Importance of Exercise National Database.
